# Supplementary material
Source: Springer Nature journal article supplement (https://www.springermedizin.de/resource/supplementary/12936_2009_930_MOESM3_ESM.pdf/9548560)

M 1 2 3 4 M 5 6 7 8

729 bp →

438 bp →

291 bp →

A

B

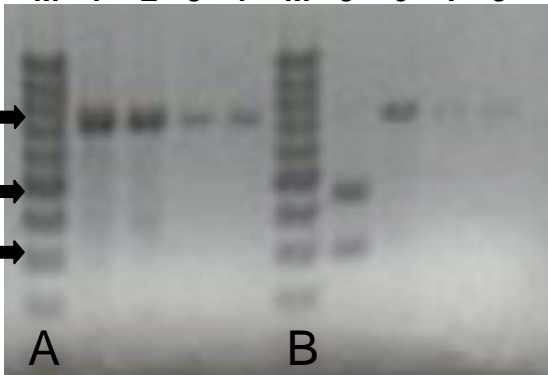

Supplement: MOESM3 [file 9548560]
